# Supplementary material for: Identification of HMG-box family establishes the significance of SOX6 in the malignant progression of glioblastoma
Source: publisher site journal article supplement (doi:10.18632/aging.103127), 2020-05-10
Supplement: Supplementary file [file aging-v12i9-103127-supplementary-material-SD1.pdf]

## SUPPLEMENTARY FIGURES

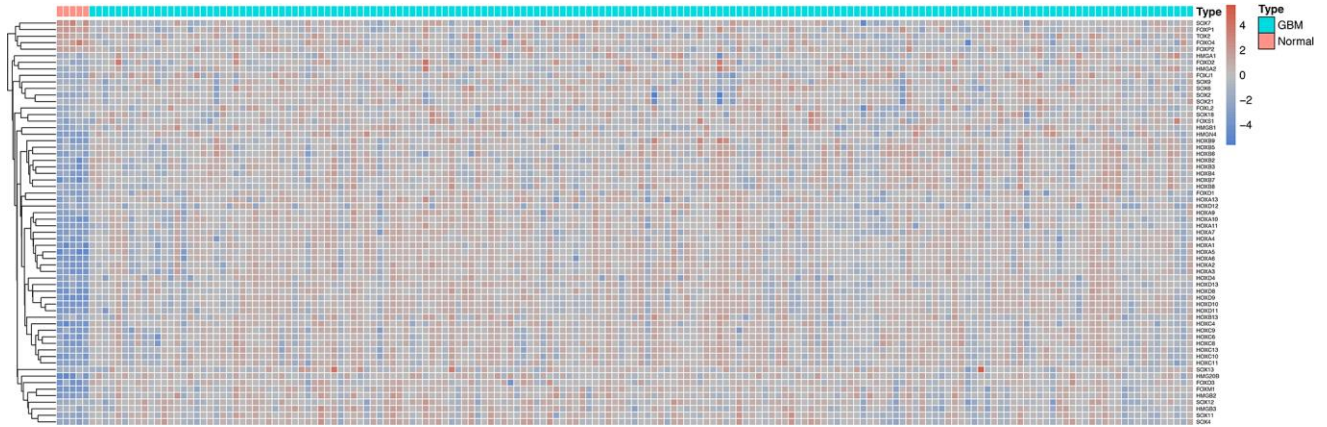

**Supplementary Figure 1.** Heatmap for HMG-box related genes between GBM and normal tissue in TCGA. Starting from the left, the first 5 datasets were normal tissues, and the remaining 169 were GBM tissues.

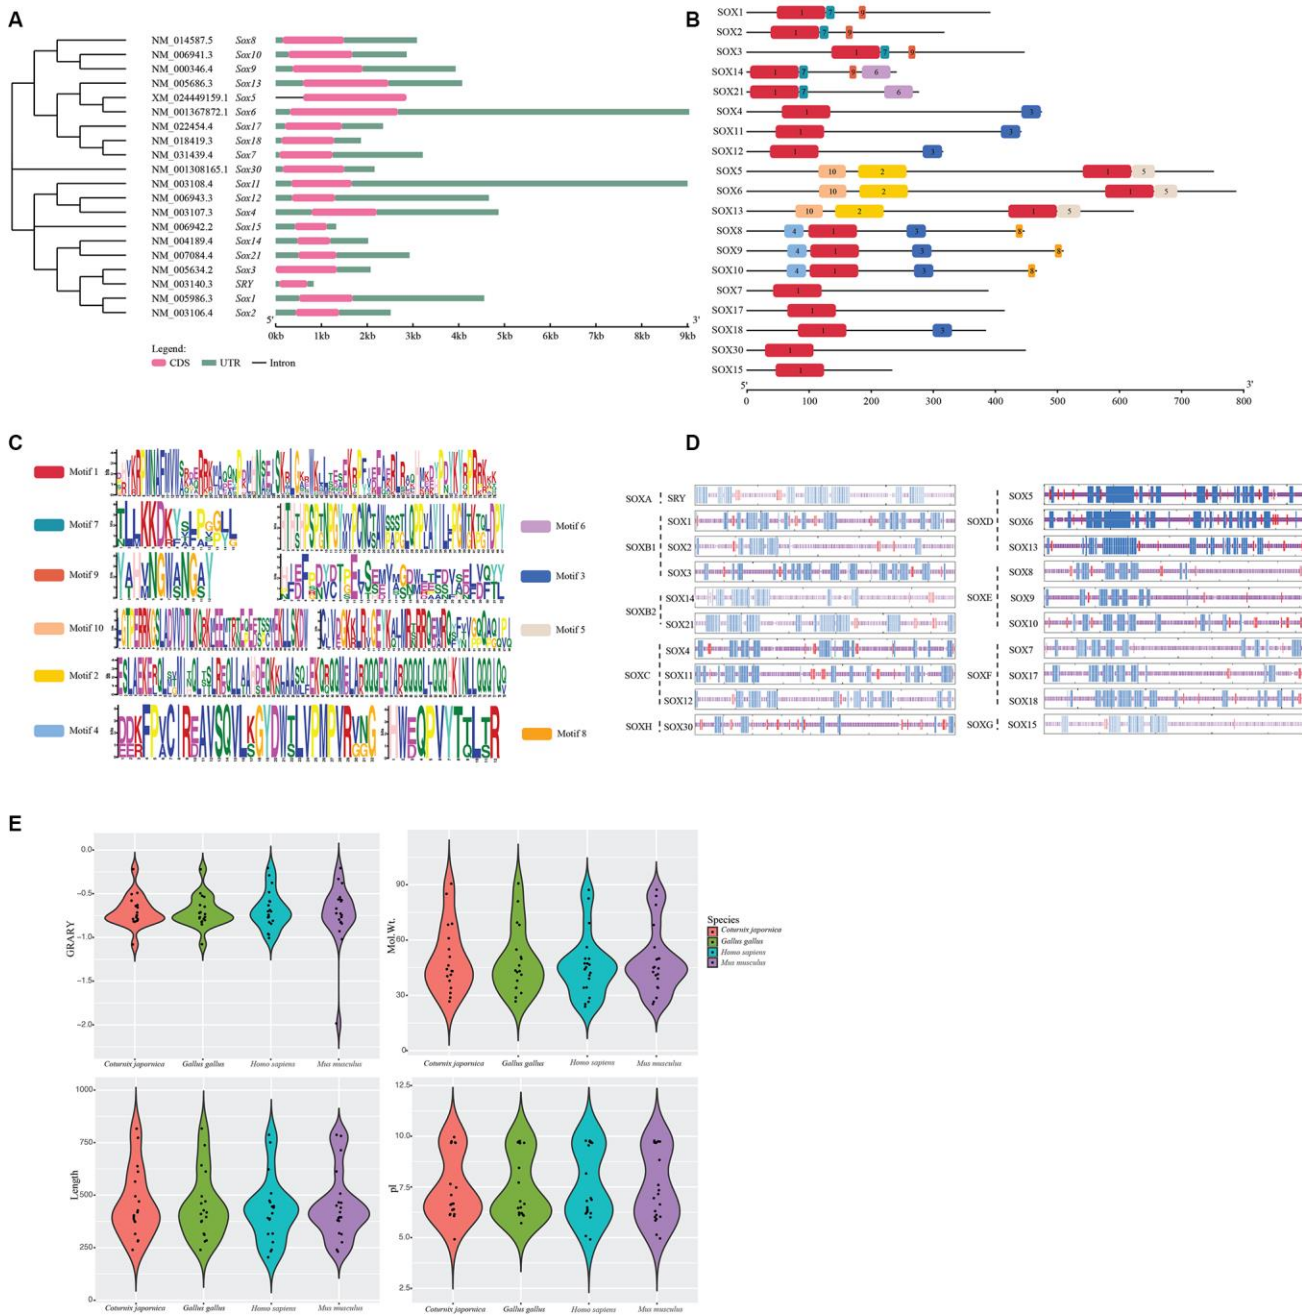

**Supplementary Figure 2. Structures analyses of SOX gene family in humans.** (A) Phylogenetic and protein structures analyses of SOX gene family in humans. (B and C) SOX motif prediction. (D) SOX protein secondary structures in humans. The  $\alpha$ -helix,  $\beta$ -sheet and disordered loop regions are drawn in blue, red and purple, respectively. (E) Protein properties for SOX genes identified from *Homo sapiens*, *Mus musculus*, *Coturnix japonica*, and *Gallus gallus*.

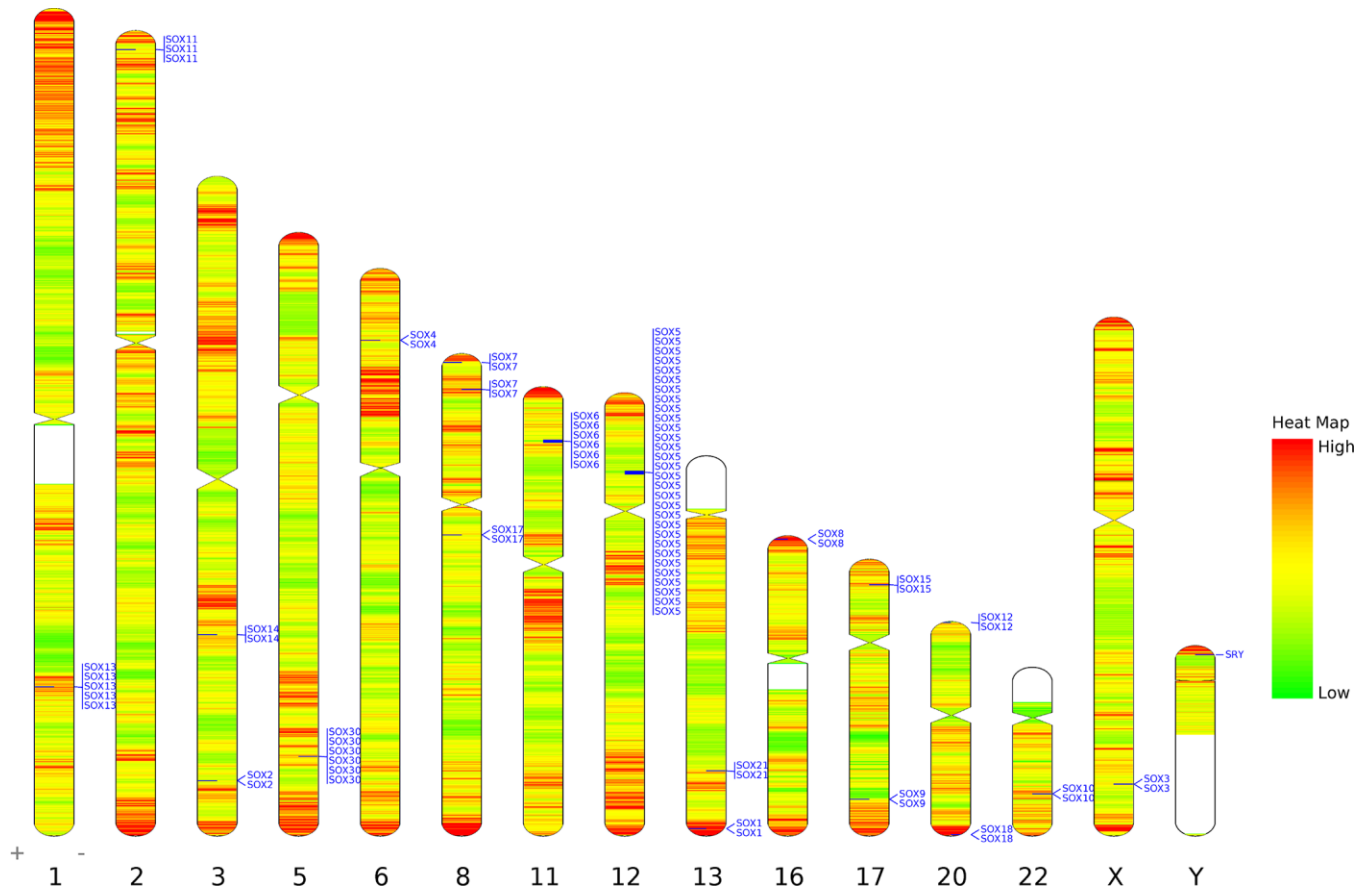

Supplementary Figure 3. Distribution of the SOX gene family on human chromosomes.
