# Supplementary material for: Identification of HMG-box family establishes the significance of SOX6 in the malignant progression of glioblastoma
Source: publisher site journal article supplement (doi:10.18632/aging.103127), 2020-05-10
Supplement: Supplementary file [file aging-v12i9-103127-supplementary-material-SD2.pdf]

## SUPPLEMENTARY TABLES

**Supplementary Table 1. The composition of SOX protein secondary structures in humans.**

| <b>Group</b> | <b>Type</b> | <b>Alpha helix (%)</b> | <b>Beta sheets (%)</b> | <b>Random coil (%)</b> |
|--------------|-------------|------------------------|------------------------|------------------------|
| SOXA         | SRY         | 36.27                  | 3.92                   | 56.37                  |
|              | SOX1        | 33.76                  | 4.6                    | 58.57                  |
| SOXB1        | SOX2        | 15.14                  | 3.15                   | 79.18                  |
|              | SOX3        | 31.39                  | 3.14                   | 62.33                  |
| SOXB2        | SOX14       | 21.25                  | 2.92                   | 73.33                  |
|              | SOX21       | 37.68                  | 4.35                   | 55.8                   |
| SOXC         | SOX4        | 24.05                  | 4.64                   | 67.51                  |
|              | SOX11       | 28.12                  | 5.22                   | 62.59                  |
| SOXD         | SOX12       | 28.25                  | 1.9                    | 66.67                  |
|              | SOX5        | 35.02                  | 5.46                   | 56.86                  |
|              | SOX6        | 38.12                  | 4.45                   | 54.89                  |
| SOXE         | SOX13       | 30.87                  | 4.18                   | 63.34                  |
|              | SOX8        | 15.7                   | 3.81                   | 79.37                  |
|              | SOX9        | 14.93                  | 1.77                   | 81.73                  |
| SOXF         | SOX10       | 19.74                  | 6.01                   | 71.03                  |
|              | SOX7        | 22.94                  | 0.77                   | 74.23                  |
|              | SOX17       | 21.26                  | 2.17                   | 74.4                   |
| SOXH         | SOX18       | 28.91                  | 2.34                   | 67.97                  |
|              | SOX30       | 11.83                  | 7.81                   | 77.68                  |
| SOXG         | SOX15       | 19.31                  | 1.72                   | 78.54                  |

**Supplementary Table 2. Predictions for protein properties for SOX from four species.**

| <b>pI</b> | <b>GRAVY</b> | <b>Length</b> | <b>Mol.Wt.</b> | <b>Species</b>       |
|-----------|--------------|---------------|----------------|----------------------|
| 9.7       | -0.375       | 391           | 39.02          | <i>Homo_sapiens</i>  |
| 6.19      | -0.825       | 466           | 49.91          | <i>Homo_sapiens</i>  |
| 4.91      | -0.702       | 441           | 46.68          | <i>Homo_sapiens</i>  |
| 5.08      | -0.96        | 315           | 34.12          | <i>Homo_sapiens</i>  |
| 6.25      | -0.766       | 622           | 69.23          | <i>Homo_sapiens</i>  |
| 9.68      | -0.585       | 240           | 26.49          | <i>Homo_sapiens</i>  |
| 9.78      | -0.843       | 233           | 25.25          | <i>Homo_sapiens</i>  |
| 6         | -0.633       | 414           | 44.12          | <i>Homo_sapiens</i>  |
| 8.16      | -0.589       | 384           | 40.89          | <i>Homo_sapiens</i>  |
| 9.74      | -0.742       | 317           | 34.31          | <i>Homo_sapiens</i>  |
| 9.74      | -0.206       | 276           | 28.58          | <i>Homo_sapiens</i>  |
| 9.78      | -0.29        | 446           | 45.21          | <i>Homo_sapiens</i>  |
| 6.81      | -0.701       | 448           | 49.88          | <i>Homo_sapiens</i>  |
| 6.87      | -0.483       | 474           | 47.26          | <i>Homo_sapiens</i>  |
| 6.38      | -0.745       | 751           | 82.58          | <i>Homo_sapiens</i>  |
| 6.95      | -0.809       | 787           | 87.24          | <i>Homo_sapiens</i>  |
| 6.2       | -0.687       | 388           | 42.20          | <i>Homo_sapiens</i>  |
| 6.49      | -0.77        | 446           | 47.31          | <i>Homo_sapiens</i>  |
| 6.31      | -1.007       | 509           | 56.14          | <i>Homo_sapiens</i>  |
| 9.55      | -0.968       | 204           | 23.88          | <i>Homo_sapiens</i>  |
| 9.7       | -0.379       | 391           | 39.05          | <i>Mus_musculus</i>  |
| 9.74      | -0.724       | 319           | 34.41          | <i>Mus_musculus</i>  |
| 9.78      | -0.332       | 450           | 45.44          | <i>Mus_musculus</i>  |
| 7.15      | -0.539       | 440           | 45.04          | <i>Mus_musculus</i>  |
| 5.92      | -0.767       | 714           | 79.13          | <i>Mus_musculus</i>  |
| 6.95      | -0.824       | 787           | 87.32          | <i>Mus_musculus</i>  |
| 6.01      | -0.671       | 380           | 41.49          | <i>Mus_musculus</i>  |
| 6.64      | -0.796       | 464           | 49.88          | <i>Mus_musculus</i>  |
| 6.31      | -1.021       | 507           | 56.08          | <i>Mus_musculus</i>  |
| 6.12      | -0.827       | 466           | 49.95          | <i>Mus_musculus</i>  |
| 4.96      | -0.727       | 395           | 42.63          | <i>Mus_musculus</i>  |
| 5.14      | -0.929       | 314           | 34.08          | <i>Mus_musculus</i>  |
| 6.03      | -0.745       | 613           | 68.17          | <i>Mus_musculus</i>  |
| 9.68      | -0.587       | 240           | 26.52          | <i>Mus_musculus</i>  |
| 9.68      | -0.842       | 231           | 25.31          | <i>Mus_musculus</i>  |
| 5.85      | -0.569       | 419           | 44.65          | <i>Mus_musculus</i>  |
| 7.6       | -0.565       | 377           | 40.90          | <i>Mus_musculus</i>  |
| 9.74      | -0.207       | 276           | 28.61          | <i>Mus_musculus</i>  |
| 8.83      | -0.575       | 782           | 83.94          | <i>Mus_musculus</i>  |
| 7.34      | -1.984       | 395           | 49.49          | <i>Mus_musculus</i>  |
| 9.7       | -0.495       | 373           | 37.93          | <i>Gallus_gallus</i> |
| 9.77      | -0.78        | 312           | 34.10          | <i>Gallus_gallus</i> |
| 9.66      | -0.712       | 316           | 34.01          | <i>Gallus_gallus</i> |
| 9.68      | -0.63        | 240           | 26.67          | <i>Gallus_gallus</i> |
| 9.74      | -0.22        | 280           | 28.80          | <i>Gallus_gallus</i> |
| 7.71      | -0.65        | 428           | 43.11          | <i>Gallus_gallus</i> |

|      |        |     |       |                           |
|------|--------|-----|-------|---------------------------|
| 5.72 | -0.818 | 396 | 43.50 | <i>Gallus_gallus</i>      |
| 8.44 | -0.72  | 285 | 31.26 | <i>Gallus_gallus</i>      |
| 6.13 | -0.733 | 737 | 80.99 | <i>Gallus_gallus</i>      |
| 6.66 | -0.825 | 817 | 90.72 | <i>Gallus_gallus</i>      |
| 6.13 | -0.801 | 612 | 68.18 | <i>Gallus_gallus</i>      |
| 6.46 | -0.788 | 470 | 50.83 | <i>Gallus_gallus</i>      |
| 6.23 | -1.078 | 494 | 54.85 | <i>Gallus_gallus</i>      |
| 6.2  | -0.851 | 461 | 49.86 | <i>Gallus_gallus</i>      |
| 6.21 | -0.524 | 410 | 42.60 | <i>Gallus_gallus</i>      |
| 6.49 | -0.766 | 418 | 46.23 | <i>Gallus_gallus</i>      |
| 6.79 | -0.769 | 377 | 41.22 | <i>Gallus_gallus</i>      |
| 6.09 | -0.536 | 642 | 69.47 | <i>Gallus_gallus</i>      |
| 9.7  | -0.505 | 373 | 37.92 | <i>Coturnix_japornica</i> |
| 9.96 | -0.641 | 404 | 44.22 | <i>Coturnix_japornica</i> |
| 9.68 | -0.715 | 316 | 34.03 | <i>Coturnix_japornica</i> |
| 9.68 | -0.63  | 240 | 26.67 | <i>Coturnix_japornica</i> |
| 9.74 | -0.218 | 280 | 28.77 | <i>Coturnix_japornica</i> |
| 7.1  | -0.658 | 427 | 43.11 | <i>Coturnix_japornica</i> |
| 4.92 | -0.77  | 396 | 43.18 | <i>Coturnix_japornica</i> |
| 7.65 | -0.805 | 285 | 31.27 | <i>Coturnix_japornica</i> |
| 6.15 | -0.746 | 773 | 85.08 | <i>Coturnix_japornica</i> |
| 6.66 | -0.817 | 816 | 90.57 | <i>Coturnix_japornica</i> |
| 6.13 | -0.81  | 612 | 68.32 | <i>Coturnix_japornica</i> |
| 6.37 | -0.82  | 470 | 50.90 | <i>Coturnix_japornica</i> |
| 6.16 | -1.08  | 495 | 55.04 | <i>Coturnix_japornica</i> |
| 7.47 | -0.788 | 565 | 60.97 | <i>Coturnix_japornica</i> |
| 6.68 | -0.58  | 387 | 40.39 | <i>Coturnix_japornica</i> |
| 6.4  | -0.791 | 418 | 46.22 | <i>Coturnix_japornica</i> |
| 6.62 | -0.759 | 377 | 41.16 | <i>Coturnix_japornica</i> |
| 6.07 | -0.49  | 638 | 68.85 | <i>Coturnix_japornica</i> |

---
